# Supplementary material for: Electroacupuncture facilitates the integration of a grafted TrkC‐modified mesenchymal stem cell‐derived neural network into transected spinal cord in rats via increasing neurotrophin‐3
Source: PubMed Central journal article supplement (PMC8193704; doi:10.1111/cns.13638), 2021-03-24
Supplement: CNS-27-776-s003.pdf [file CNS-27-776-s003.pdf]

## Supporting Information

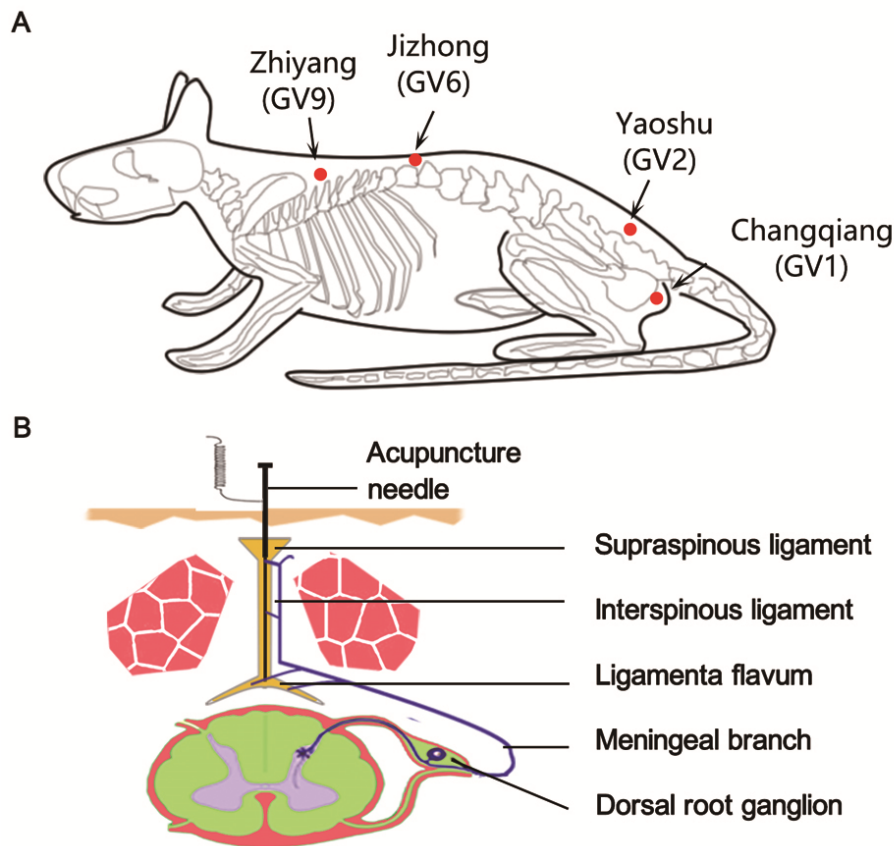

**FIGURE S1** Showing two pattern diagrams of the location of the GV-EA. (A) A pattern diagram indicates selected electroacupuncture acupoints located at GV in rat. Arrows show the four GV acupoints: Zhiyang (GV9), Jizhong (GV6), Yaoshu (GV2) and Changqiang (GV1). (B) Another pattern diagram of the afferent pathway of GV-EA stimulation and the figure indicates that the stimulation information of GV-EA might have been transmitted first to the dorsal root ganglion (DRG) by peripheral branches of meningeal branch and finally transmitted to the spinal cord by the DRG's central branches.

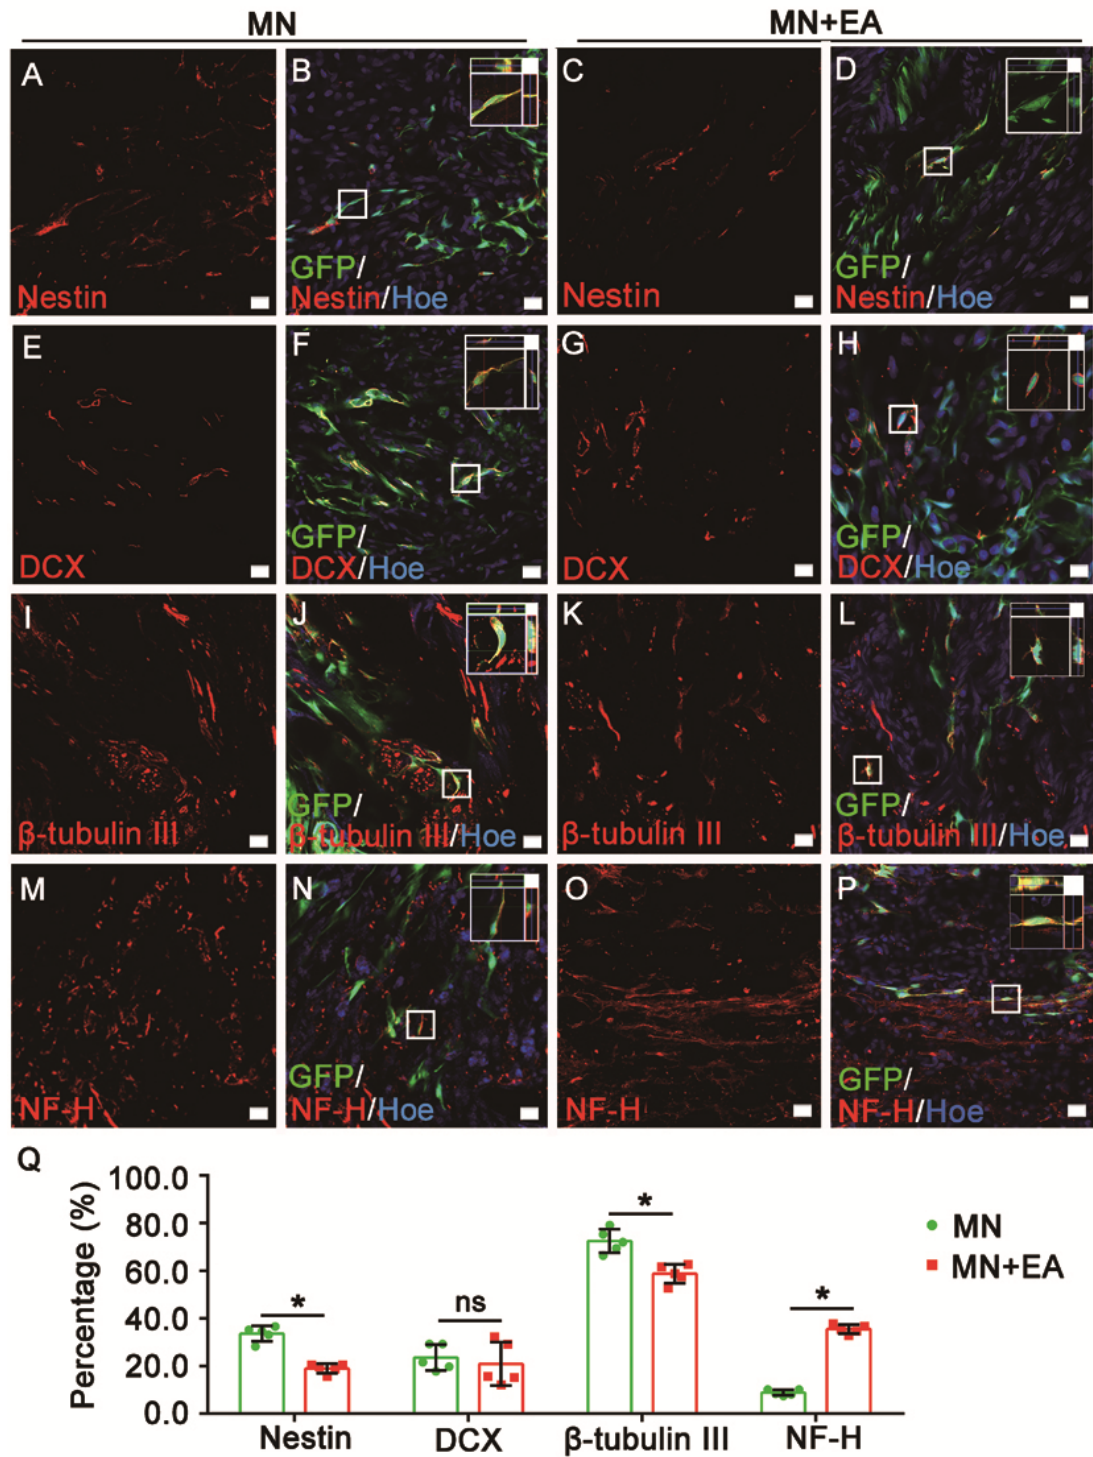

**FIGURE S2** Donor mesenchymal stem cells (MSCs) increased the rate of differentiation into neuron-like cells at the injury/graft site of the spinal cord following electroacupuncture (EA) treatment. (A–P) MSCs differentiated into Nestin-positive neural stem cells (A)–(D), doublecortin (DCX)-positive neural progenitor cells (E)–(H),  $\beta$ -tubulin III-positive immature neuron-like cells (I)–(L), and neurofilament-H (NF-H)-positive neuron-like cells (M)–(P) after 8 weeks of transplantation in the MSC-derived neural network (MN) and MN+EA groups. Inset shows the co-localization between green fluorescent protein (GFP), Hoechst33342

(Hoe), and Nestin (B) and (D), DCX (F) and (H),  $\beta$ -tubulin III (J) and (L) or NF-H (N) and (P). Scale bars = 20  $\mu\text{m}$  in (A)–(P). (Q) Quantification of the percentages of Nestin-, DCX-,  $\beta$ -tubulin III-, and NF-H-positive cells among all MSC-derived cells in the MN and MN+EA groups. Values represent the mean  $\pm$  SD ( $n = 5/\text{group}$ , Student's t-test,  $*p < 0.05$ ).

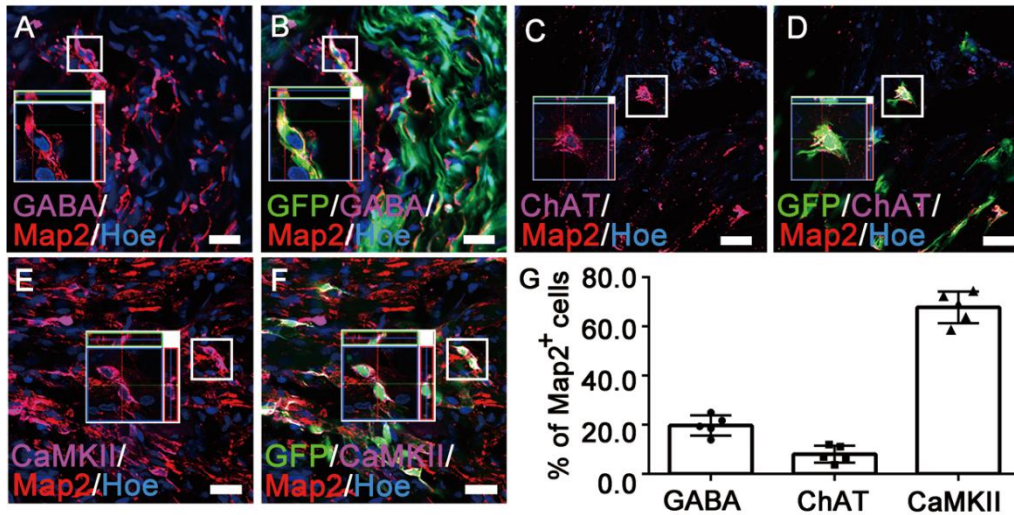

**FIGURE S3** Phenotypic characterization of MSC-derived neuron-like cells in the MN+EA group at 8 weeks after transplantation. (A)-(F) Confocal images of neural progenitor cell grafts. Map2 expressing neuron-like cells in grafts express GABA (A) and (B), ChAT (C) and (D), and CaMKII (E) and (F). Insets show co-localization of GFP, Map2 and Hoe with GABA (B), ChAT (D) or CaMKII (F). (G) Bar chart showing the quantification of neuronal subtypes in the MN+EA group. After 8 weeks, most MSC-derived neurons express excitatory neuron markers CaMKII. Values represent mean  $\pm$  SD.  $n = 5$ /group. Scale bars = 20  $\mu$ m in (A)-(F).

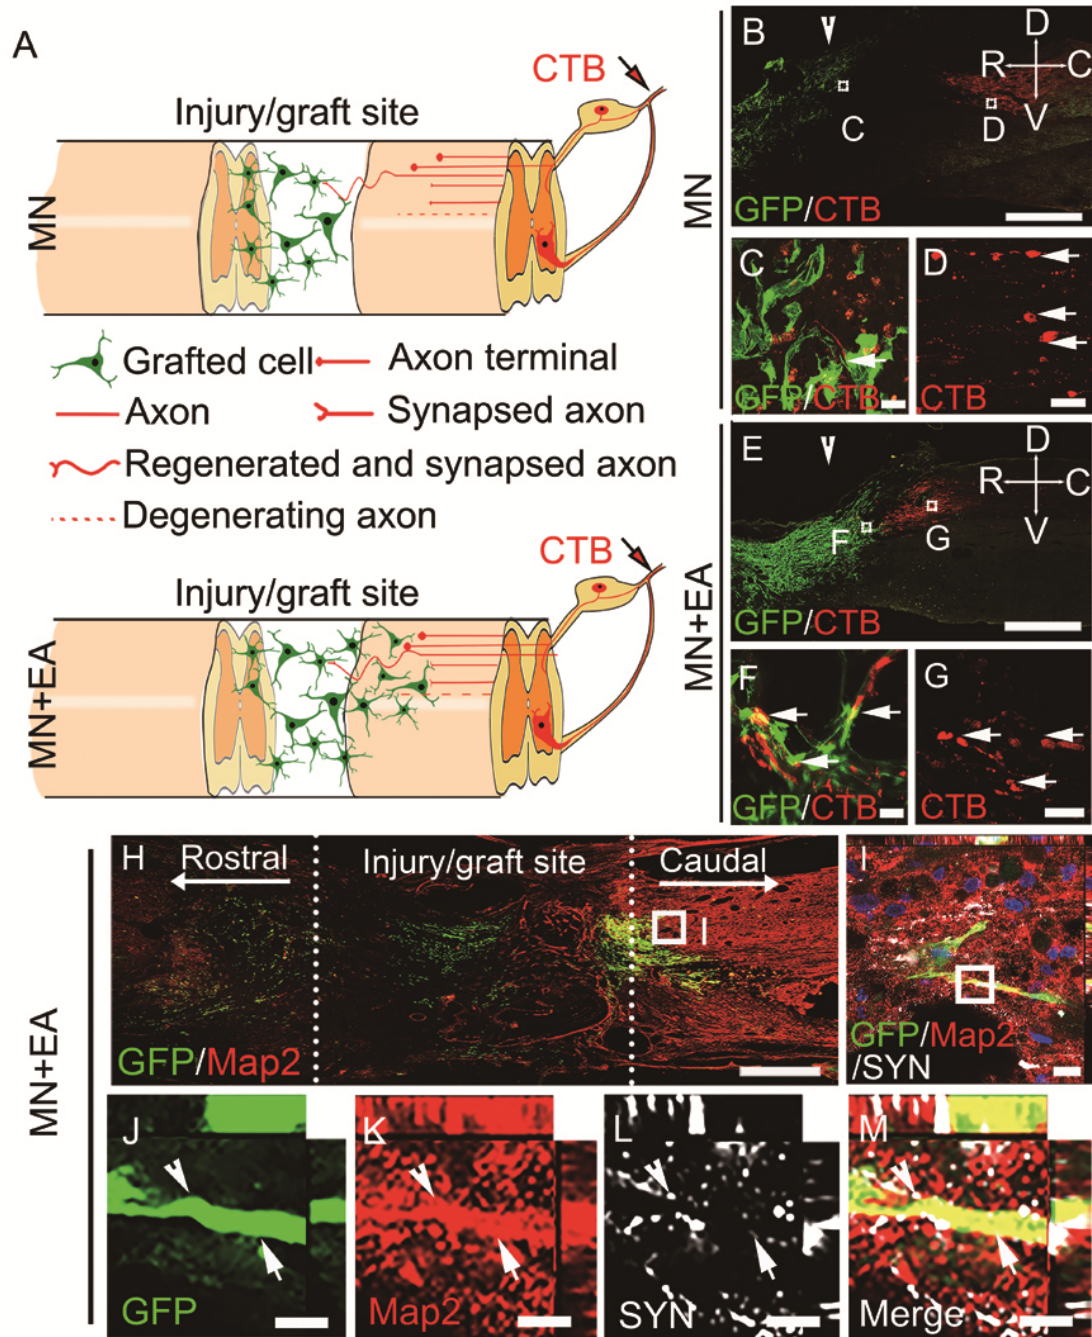

**FIGURE S4** Implanted MSC-derived cells migrated into the caudal spinal cord and made contacts with host caudal neurons. (A) A schematic diagram depicting the labeling of ascending nerve fibers by injecting CTB-555 into the sciatic nerve. (B) and (E) Low-magnification images showing GFP<sup>+</sup> cells (green) and CTB<sup>+</sup> ascending nerve fibers (red) in sagittal sections of spinal cord; arrowheads indicate the interface between the injury/graft site and the caudal host tissue, respectively. (C) and (F) Sagittal section of injured spinal cord showing CTB<sup>+</sup> ascending nerve fibers making potential synaptic contacts (arrows) with GFP<sup>+</sup> cells. (D) and (G) Sagittal view of injured spinal cord showing CTB<sup>+</sup> ascending nerve fiber terminals (arrows). (H) A sagittal section showing GFP<sup>+</sup> MSC-derived neuron-like cells migrated into the host caudal spinal cord tissue and contacted with Map2<sup>+</sup> nerve fibers (I). (J)-(M) Showing

enlarged view of images of boxed area in (I), triple-labeled with anti-GFP (J), Map2 (K) and SYN (L), and their merged image (M). Arrowheads indicate host Map2<sup>+</sup>/SYN<sup>+</sup> axon terminals contacting with a GFP<sup>+</sup>/Map2<sup>+</sup> MSC-derived neuron-like cell process. Arrows point at GFP<sup>+</sup>/Map2<sup>+</sup> MSC-derived neuron-like cell process. D, V, R and C on the right corner in (B) and (E) denote dorsal, ventral, rostral, and caudal to the spinal cord, respectively. Scale bars = 1 mm in (B) and (E); 20  $\mu$ m in (C)-(D); 500  $\mu$ m in (H); 10  $\mu$ m in (I); 5  $\mu$ m in (J)-(M).

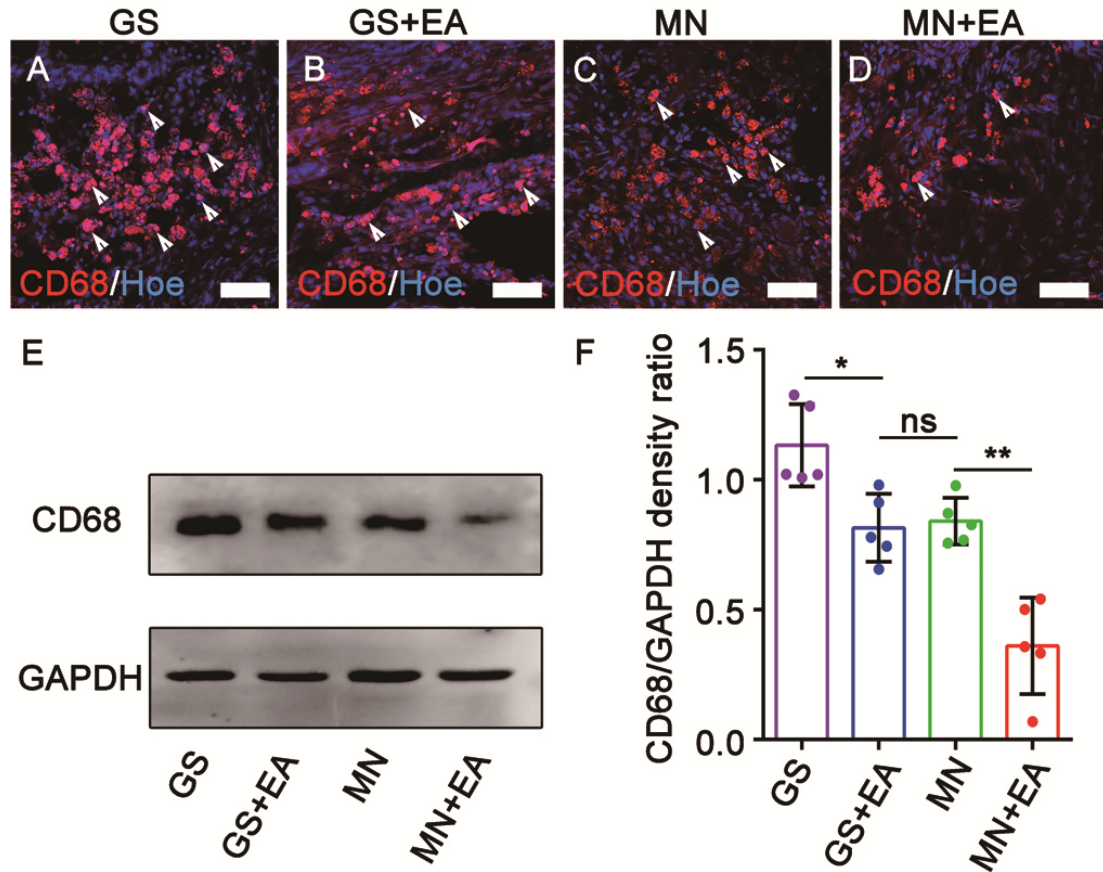

**FIGURE S5** More effective inflammatory alleviation was observed after mesenchymal stem cell (MSC)-derived neural network (MN) implantation combined with electroacupuncture (EA) treatment. (A)–(D) CD68<sup>+</sup> cells at the injury/graft site of the spinal cord in the GS, GS+EA, MN, and MN+EA groups. Scale bars = 50 μm in (A)–(D). (E) Western blot analysis showing the protein levels of CD68 in each group. Glyceraldehyde 3-phosphate dehydrogenase (GAPDH) was used as a loading control. (F) Bar chart showing relative quantification of CD68 protein expression in all four groups. Values represent the mean ± SD. *n* = 5/group. \* and \*\* indicate *p* < 0.05 and *p* < 0.01, respectively. GS: gelatin sponge scaffold with no cells; GS+EA: GS combined electroacupuncture; MN: MSC-derived neural network; MN+EA: MN combined with electroacupuncture.

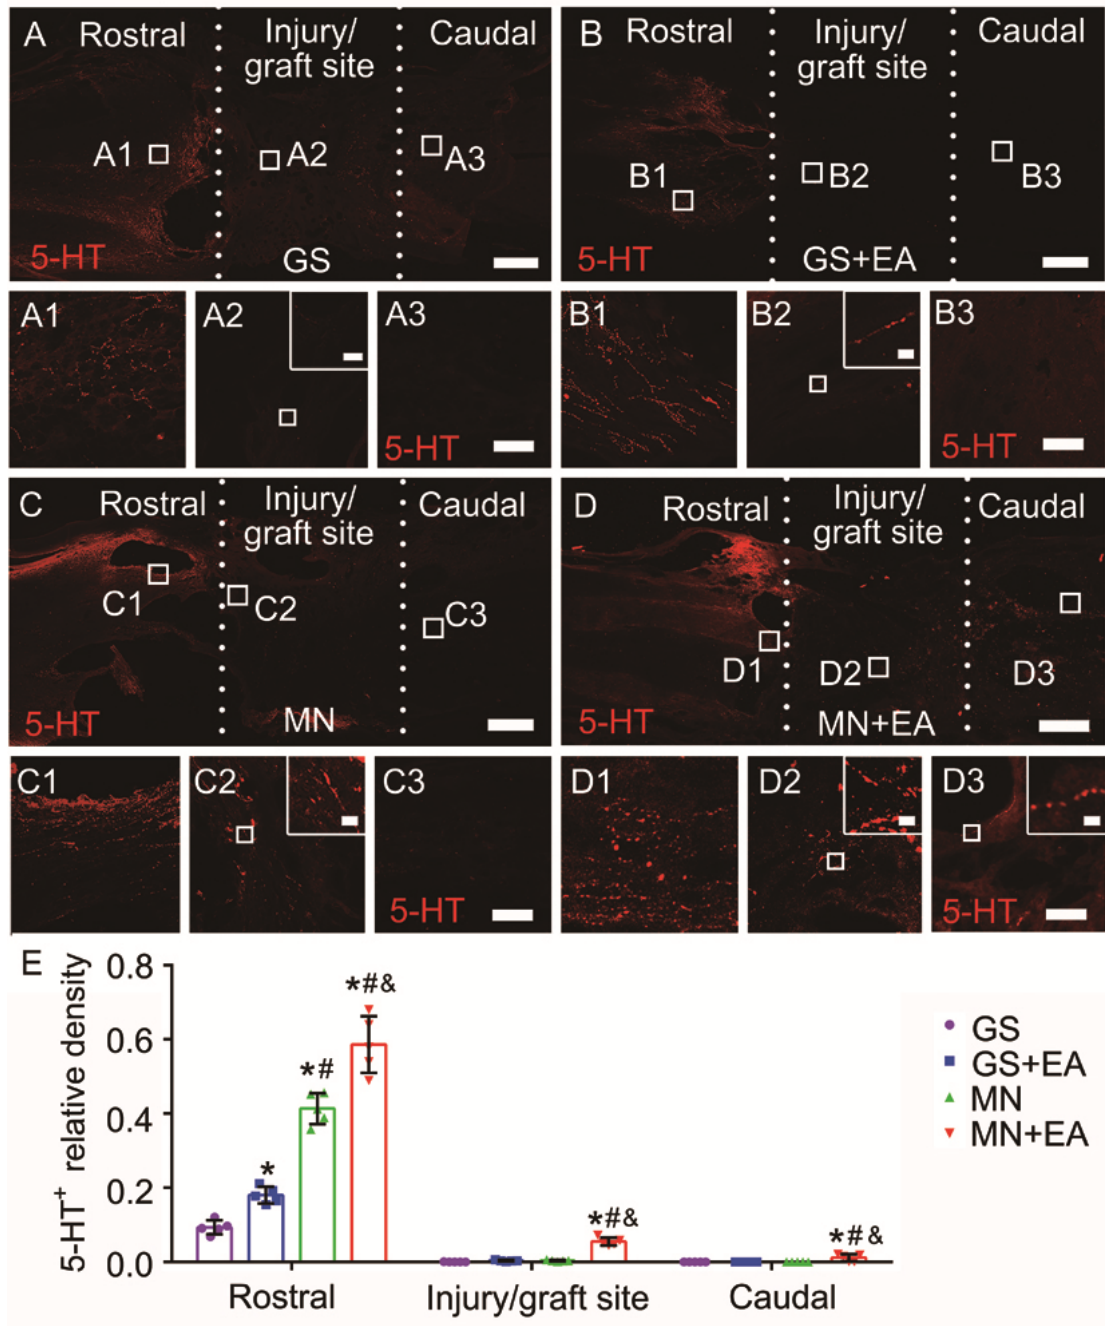

**FIGURE S6** Regeneration of 5-hydroxytryptamine (5-HT)<sup>+</sup> axons. (A–D) Longitudinal sections of the spinal cord with 5-HT<sup>+</sup> axons in the GS (A), GS+EA (B), MN (C), and MN+EA (D) groups. (A1)–(D3) Immunofluorescent images of the boxes in (A)–(D), respectively. Scale bars = 500  $\mu$ m in (A)–(D); 50  $\mu$ m in (A1)–(D3); 10  $\mu$ m in (F)–(I); 2  $\mu$ m in (i). (E) Bar chart comparing the quantity of 5-HT<sup>+</sup> axons in the rostral and caudal areas relative to the injury/graft site among the four groups. Values represent the mean  $\pm$  SD ( $n = 5$ /group, LSD- $t$ , \* $p < 0.05$  vs. the GS group, # $p < 0.05$  vs. the GS+EA group, & $p < 0.05$  vs. the MN group). GS: gelatin sponge scaffold with no cells; GS+EA: GS combined electroacupuncture; MN: MSC-derived neural network; MN+EA: MN combined with electroacupuncture.



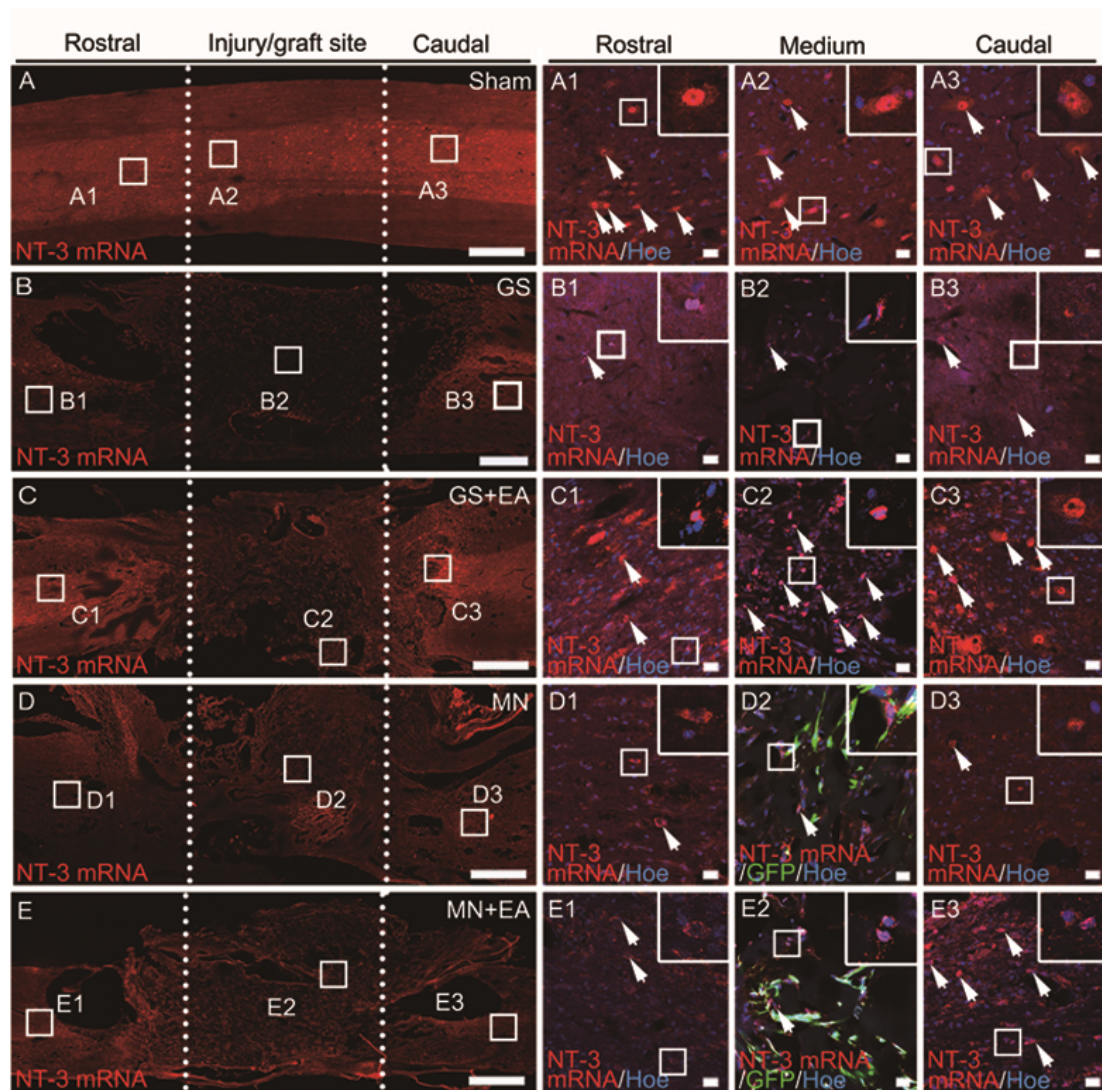

**FIGURE S7** *In situ* hybridization analysis showing the distribution of NT-3 mRNA in injured spinal cord. (A)-(E3) Representative images showing the immunostaining of NT-3 mRNA within injured spinal cord in the Sham group (A), (A1)-(A3); GS group (B), (B1)-(B3); GS+EA group (C), (C1)-(C3); MN group (D), (D1)-(D3); and MN+EA group (E), (E1)-(E3), respectively. The cell nuclei were counterstained by Hoechst33342 (Hoe). The insets that showed a magnification (zoom) image of the cells in the tissue have been respectively added in (A)-(E3). Scale bars = 500  $\mu$ m in (A)-(E); 10  $\mu$ m in (A1)-(A3), (B1)-(B3), (C1)-(C3), (D1)-(D3) and (E1)-(E3).

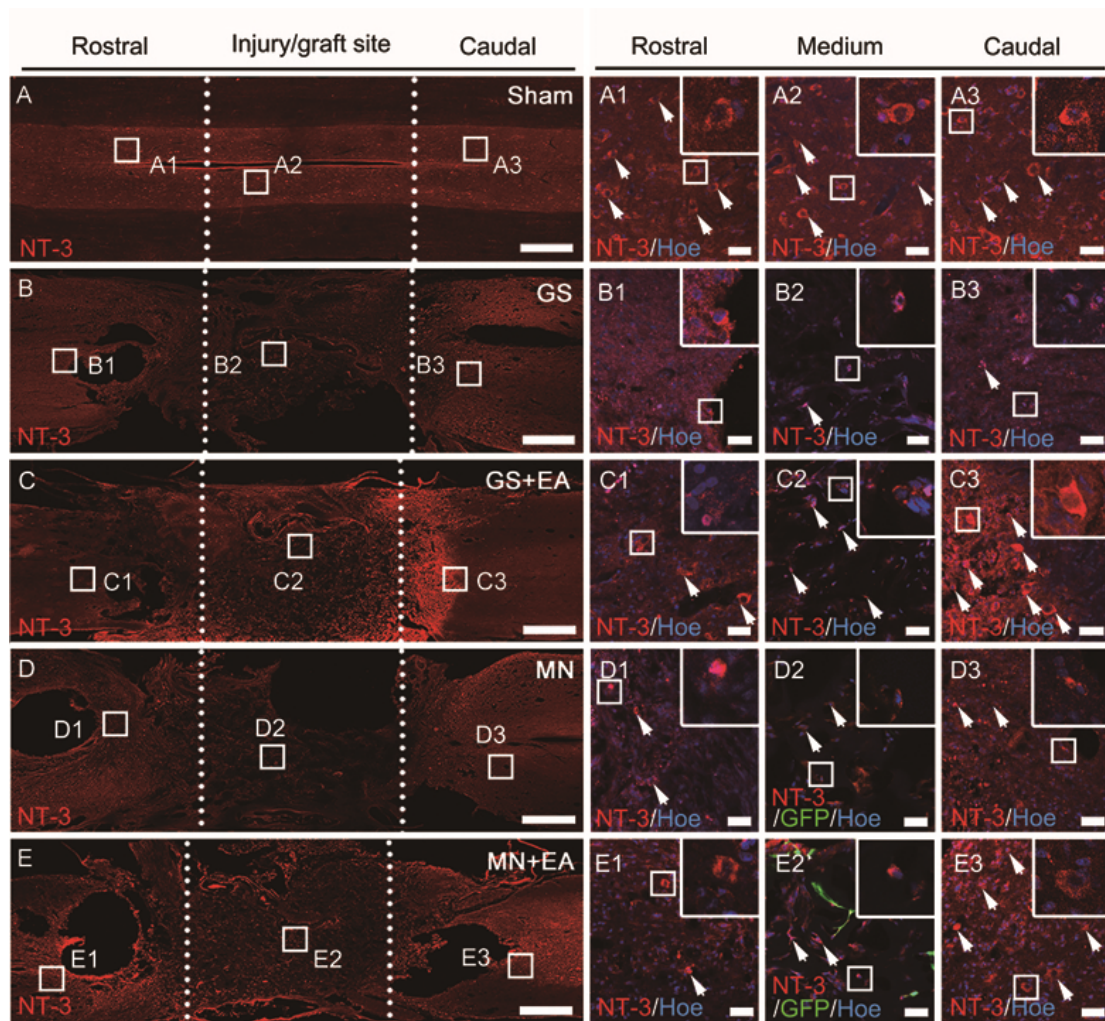

**FIGURE S8** Distribution of NT-3 in injured spinal cord. (A)-(E3) Representative images showing NT-3 immunostaining in injured spinal cord in the Sham group (A), (A1)-(A3), the GS group (B), (B1)-(B3), the GS+EA group (C), (C1)-(C3), the MN group (D), (D1)-(D3) and the MN+EA group (E), (E1)-(E3), respectively. The cell nuclei were counterstained by Hoechst33342 (Hoe). The insets that showed a magnification (zoom) image of the cells in the tissue have been respectively added in (A)-(E3). Scale bars = 500  $\mu$ m in (A)-(E); 20  $\mu$ m in (A1)-(A3), (B1)-(B3), (C1)-(C3), (D1)-(D3) and (E1)-(E3).

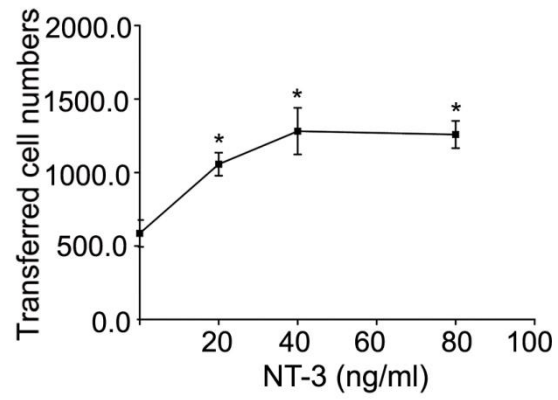

**FIGURE S9** Effect of NT-3 on TrkC-MSC migration *in vitro* (48 h). NT-3 attracted TrkC-MSC migration in a dose-dependent manner. Results are presented as mean  $\pm$  SD. \* $p < 0.05$  vs. Control (NT-3 = 0 ng/ml).

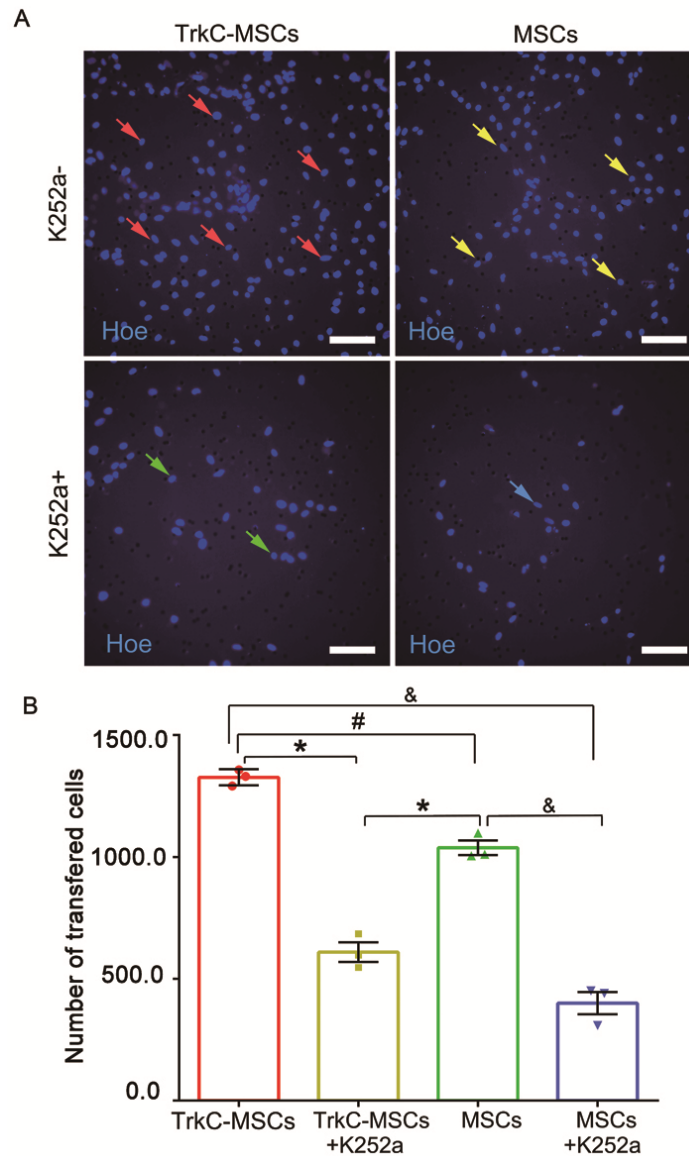

**FIGURE S10** Chemotactic migration of TrkC-MSCs. (A) Transwell migration assay showed migration of MSCs and TrkC-MSCs in response to a solution of NT-3 ( $c = 40$  ng/ml) with K252a ( $c = 10$  nM) or a solution of NT-3 without K252a, respectively. The nuclei of MSCs and TrkC-MSCs were stained with Hoechst33342 (Hoe). Scale bars =  $100 \mu\text{m}$  in (A). (B) Bar chart showing the number of migrating cells in different groups as assessed by Transwell experiment. Results are presented as mean  $\pm$  S.D., \* $p < 0.05$  vs. TrkC-MSCs+K252a, # $p < 0.05$  vs. MSCs, & $p < 0.05$  vs. MSCs+K252a.

**Table S1** Primary and secondary antibodies

| Antibodies                                           | Species | Type           | Dilution | Source                                    |
|------------------------------------------------------|---------|----------------|----------|-------------------------------------------|
| Neurofilament 200 (NF)                               | Rabbit  | Polyclonal IgG | 1:400    | Merck Millipore, Billerica, USA           |
| Nestin                                               | Mouse   | Monoclonal IgG | 1:200    | Abcam, United Kingdom                     |
| Doublecortin (DCX)                                   | Rabbit  | Polyclonal IgG | 1:400    | Abcam, United Kingdom                     |
| $\beta$ -tubulin III                                 | Rabbit  | Polyclonal IgG | 1:500    | Sigma, St. Louis, USA                     |
| Neurofilament 200 (NF-H)                             | Rabbit  | Polyclonal IgG | 1:600    | Merck Millipore, Billerica, USA           |
| Neurofilament 200 (NF-H)                             | Mouse   | Monoclonal IgG | 1:600    | Sigma, St. Louis, USA                     |
| CD68                                                 | Mouse   | Monoclonal IgG | 1:100    | R&D System                                |
| Postsynaptic density Protein 95 (PSD95)              | Rabbit  | Polyclonal IgG | 1:800    | Abcam, London, UK                         |
| Vesicular glutamate Transporter 2 (VGlut-2)          | Rabbit  | Polyclonal IgG | 1:1000   | Sigma, St. Louis, USA                     |
| Microtubule-associated protein 2 (MAP2)              | Chicken | Monoclonal IgG | 1:1500   | Abcam, London, UK                         |
| Green fluorescent protein (GFP)                      | Rabbit  | Polyclonal IgG | 1:500    | Merck Millipore, Billerica, USA           |
| Green fluorescent protein (GFP)                      | Mouse   | Monoclonal IgG | 1:1000   | Merck Millipore, Billerica, USA           |
| Glyceraldehyde-3-phosphate dehydrogenase(GAPDH)      | Mouse   | Monoclonal IgG | 1:2500   | Proteintech, Rosemont, USA                |
| calcium/calmodulin-dependent protein kinase (CaMKII) | Mouse   | Monoclonal IgG | 1:100    | Santa Cruz Biotechnology, USA             |
| $\gamma$ -aminobutyric acid (GABA)                   | Rabbit  | Polyclonal IgG | 1:500    | Boster, Wuhan, China                      |
| Microtubule-associated protein 2 (MAP2)              | Mouse   | Monoclonal IgG | 1:1000   | Sigma, St. Louis, USA                     |
| Microtubule-associated protein 2 (MAP2)              | Rabbit  | Polyclonal IgG | 1:800    | Sigma, St. Louis, USA                     |
| Choline acetyltransferase (ChAT)                     | Rabbit  | Polyclonal IgG | 1:800    | Merck Millipore, Billerica, USA           |
| Pseudorabies virus (PRV)                             | Rabbit  | Polyclonal IgG | 1:800    | Abcam, London, UK                         |
| Synaptophysin (SYN)                                  | Mouse   | Monoclonal IgG | 1:200    | Sigma, St. Louis, USA                     |
| Neurotrophin-3 (NT-3)                                | Rabbit  | Polyclonal IgG | 1:300    | Santa Cruz Biotechnology, Santa Cruz, USA |
| 5-hydroxytryptamine (5-HT)                           | Rabbit  | Polyclonal IgG | 1:8000   | Sigma, St. Louis, USA                     |
| glyceraldehyde-3-phosphate dehydrogenase (GAPDH)     | Mouse   | Monoclonal IgG | 1:1000   | Proteintech, Rosemont, USA                |
| Horseradish Peroxidase (HRP)                         | Rabbit  | Polyclonal IgG | 1:5000   | Cell Signaling Technology, Boston, USA    |
| Horseradish Peroxidase (HRP)                         | Mouse   | Monoclonal IgG | 1:2000   | Cell Signaling Technology, Boston, USA    |
| Streptavidin, Alexa Fluor™ 555 conjugate             | ---     | ---            | 1:500    | Invitrogen, Waltham, USA                  |
| Hoechst33342 (Hoe)                                   | ---     | ---            | 1:1000   | Beyotime, Shanghai, China                 |
| Alexa 647 conjugated anti rabbit secondary antibody  | Goat    | Polyclonal IgG | 1:500    | Abcam, London, UK                         |
| Alexa555 conjugated antirabbit secondary antibody    | Goat    | Polyclonal IgG | 1:500    | Abcam, London, UK                         |
| Alexa555 conjugated antichickensecondary antibody    | Goat    | Polyclonal IgG | 1:500    | Invitrogen, Waltham, USA                  |
| Alexa647 conjugated antichickensecondary antibody    | Goat    | Polyclonal IgG | 1:500    | Abcam, London, UK                         |
| Alexa488 conjugated anti mouse secondary antibody    | Goat    | Polyclonal IgG | 1:500    | Invitrogen, Waltham, USA                  |
| Alexa555 conjugated anti mouse secondary antibody    | Goat    | Polyclonal IgG | 1:500    | Abcam, London, UK                         |
